# Supplementary material for: Cost per Responder Analysis of Secukinumab versus Adalimumab in the Treatment of Psoriatic Disease
Source: MDPI journal article supplement (doi:10.3390/vaccines10050646), 2022-04-20
Supplement: s1 [file s1]

**Supplementary Table S1.** Cost per responder of secukinumab and adalimumab (in Euro) at week 52

|                          | Secukinumab<br>(Cosentyx®) | Adalimumab<br>(Humira®) |
|--------------------------|----------------------------|-------------------------|
| ACR 20                   | 19846                      | 19766                   |
| ACR 50                   | 27820                      | 27384                   |
| ACR 70                   | 49068                      | 47204                   |
| Minimal disease activity | 34072                      | 38906                   |
| PASI 75                  | 17388                      | 22652                   |
| PASI 90                  | 22102                      | 32375                   |
| PASI 100                 | 38778                      | 56725                   |

**Supplementary Table S2.** Scenario analysis of the cost per ACR20 responder at 52 weeks.

|                          |                           | Secukinumab discount rate                                                          | 5%       | 10%      | 15%      | 20%      | 25%      | 30%      | 35%      |
|--------------------------|---------------------------|------------------------------------------------------------------------------------|----------|----------|----------|----------|----------|----------|----------|
| Adalimumab discount rate | Cost per responder (Euro) |                                                                                    | 18853.37 | 17861.09 | 16868.81 | 15876.52 | 14884.24 | 13891.96 | 12899.68 |
| 5%                       | 18778.12                  |  |          |          |          |          |          |          |          |
| 10%                      | 17789.80                  |  |          |          |          |          |          |          |          |
| 15%                      | 16801.48                  |  |          |          |          |          |          |          |          |
| 20%                      | 15813.15                  |  |          |          |          |          |          |          |          |
| 25%                      | 14824.83                  |  |          |          |          |          |          |          |          |
| 30%                      | 13836.51                  |  |          |          |          |          |          |          |          |
| 35%                      | 12848.19                  |  |          |          |          |          |          |          |          |

Green: cost per responder of secukinumab < cost per responder of adalimumab. Red: cost per responder of secukinumab > cost per responder of adalimumab.

**Supplementary Table S3.** Scenario analysis of the cost per ACR50 responder at 52 weeks.

|                          | Secukinumab discount rate | 5%       | 10%      | 15%      | 20%      | 25%      | 30%      | 35%      |
|--------------------------|---------------------------|----------|----------|----------|----------|----------|----------|----------|
| Adalimumab discount rate | Cost per responder (Euro) | 26429.31 | 25038.30 | 23647.28 | 22256.26 | 20865.25 | 19474.23 | 18083.21 |
| 5%                       | 26015.12                  |          |          |          |          |          |          |          |
| 10%                      | 24645.91                  |          |          |          |          |          |          |          |
| 15%                      | 23276.69                  |          |          |          |          |          |          |          |
| 20%                      | 21907.47                  |          |          |          |          |          |          |          |
| 25%                      | 20538.26                  |          |          |          |          |          |          |          |
| 30%                      | 19169.04                  |          |          |          |          |          |          |          |
| 35%                      | 17799.82                  |          |          |          |          |          |          |          |

Green: cost per responder of secukinumab < cost per responder of adalimumab. Red: cost per responder of secukinumab > cost per responder of adalimumab.

**Supplementary Table S4.** Scenario analysis of the cost per ACR70 responder at 52 weeks.

|                          | Secukinumab discount rate | 5%       | 10%      | 15%      | 20%      | 25%      | 30%      | 35%      |
|--------------------------|---------------------------|----------|----------|----------|----------|----------|----------|----------|
| Adalimumab discount rate | Cost per responder (Euro) | 46614.81 | 44161.40 | 41707.99 | 39254.58 | 36801.17 | 34347.75 | 31894.34 |
| 5%                       | 44844.25                  |          |          |          |          |          |          |          |
| 10%                      | 42484.03                  |          |          |          |          |          |          |          |
| 15%                      | 40123.80                  |          |          |          |          |          |          |          |
| 20%                      | 37763.58                  |          |          |          |          |          |          |          |
| 25%                      | 35403.36                  |          |          |          |          |          |          |          |
| 30%                      | 33043.13                  |          |          |          |          |          |          |          |
| 35%                      | 30682.91                  |          |          |          |          |          |          |          |

Green: cost per responder of secukinumab < cost per responder of adalimumab. Red: cost per responder of secukinumab > cost per responder of adalimumab.

**Supplementary Table S5.** Scenario analysis of the cost per MDA responder at 52 weeks.

|                          | Secukinumab discount rate | 5%       | 10%      | 15%      | 20%      | 25%      | 30%      | 35%      |
|--------------------------|---------------------------|----------|----------|----------|----------|----------|----------|----------|
| Adalimumab discount rate | Cost per responder (Euro) | 32368.49 | 30664.88 | 28961.28 | 27257.67 | 25554.07 | 23850.46 | 22146.86 |
| 5%                       | 36960.97                  |          |          |          |          |          |          |          |
| 10%                      | 35015.65                  |          |          |          |          |          |          |          |
| 15%                      | 33070.34                  |          |          |          |          |          |          |          |
| 20%                      | 31125.03                  |          |          |          |          |          |          |          |
| 25%                      | 29179.71                  |          |          |          |          |          |          |          |
| 30%                      | 27234.40                  |          |          |          |          |          |          |          |
| 35%                      | 25289.08                  |          |          |          |          |          |          |          |

Green: cost per responder of secukinumab < cost per responder of adalimumab. Red: cost per responder of secukinumab > cost per responder of adalimumab.

**Supplementary Table S6.** Scenario analysis of the cost per PASI75 responder at 52 weeks.

|                          | Secukinumab discount rate | 5%       | 10%      | 15%      | 20%      | 25%      | 30%      | 35%      |
|--------------------------|---------------------------|----------|----------|----------|----------|----------|----------|----------|
| Adalimumab discount rate | Cost per responder (Euro) | 16518.32 | 15648.94 | 14779.55 | 13910.17 | 13040.78 | 12171.39 | 11302.01 |
| 5%                       | 21519.22                  |          |          |          |          |          |          |          |
| 10%                      | 20386.63                  |          |          |          |          |          |          |          |
| 15%                      | 19254.04                  |          |          |          |          |          |          |          |
| 20%                      | 18121.45                  |          |          |          |          |          |          |          |
| 25%                      | 16988.86                  |          |          |          |          |          |          |          |
| 30%                      | 15856.27                  |          |          |          |          |          |          |          |
| 35%                      | 14723.68                  |          |          |          |          |          |          |          |

Green: cost per responder of secukinumab < cost per responder of adalimumab. Red: cost per responder of secukinumab > cost per responder of adalimumab.

**Supplementary Table S7.** Scenario analysis of the cost per PASI90 responder at 52 weeks.

|                          | Secukinumab discount rate | 5%       | 10%      | 15%      | 20%      | 25%      | 30%      | 35%      |
|--------------------------|---------------------------|----------|----------|----------|----------|----------|----------|----------|
| Adalimumab discount rate | Cost per responder (Euro) | 20997.05 | 19891.94 | 18786.83 | 17681.73 | 16576.62 | 15471.51 | 14366.40 |
| 5%                       | 30756.49                  |          |          |          |          |          |          |          |
| 10%                      | 29137.73                  |          |          |          |          |          |          |          |
| 15%                      | 27518.96                  |          |          |          |          |          |          |          |
| 20%                      | 25900.20                  |          |          |          |          |          |          |          |
| 25%                      | 24281.44                  |          |          |          |          |          |          |          |
| 30%                      | 22662.68                  |          |          |          |          |          |          |          |
| 35%                      | 21043.91                  |          |          |          |          |          |          |          |

Green: cost per responder of secukinumab < cost per responder of adalimumab. Red: cost per responder of secukinumab > cost per responder of adalimumab.

**Supplementary Table S8.** Scenario analysis of the cost per PASI100 responder at 52 weeks.

|                          | Secukinumab discount rate | 5%       | 10%      | 15%      | 20%      | 25%      | 30%      | 35%      |
|--------------------------|---------------------------|----------|----------|----------|----------|----------|----------|----------|
| Adalimumab discount rate | Cost per responder (Euro) | 36838.81 | 34899.93 | 32961.04 | 31022.16 | 29083.27 | 27144.39 | 25205.50 |
| 5%                       | 53888.47                  |          |          |          |          |          |          |          |
| 10%                      | 51052.24                  |          |          |          |          |          |          |          |
| 15%                      | 48216.00                  |          |          |          |          |          |          |          |
| 20%                      | 45379.76                  |          |          |          |          |          |          |          |
| 25%                      | 42543.53                  |          |          |          |          |          |          |          |
| 30%                      | 39707.29                  |          |          |          |          |          |          |          |
| 35%                      | 36871.06                  |          |          |          |          |          |          |          |

Green: cost per responder of secukinumab < cost per responder of adalimumab. Red: cost per responder of secukinumab > cost per responder of adalimumab.
